# Supplementary material for: Systematic Optimization of 293T Cell Electroporation: Balancing High-Efficiency Gene Delivery with Cell Viability
Source: Research Square preprint supplement (doi:10.21203/rs.3.rs-8152999/v1), 2025-12-01
Supplement: Supplementary file 1 [file 55a2ae589e4673ba79109daf.docx]

**Systematic Optimization of 293T Cell Electroporation: Balancing High-Efficiency Gene Delivery with Cell Viability**

Table S1:Chica buffers used in electroporation experiments.

| **Buffer** | **Composition** |
| --- | --- |
| 1M | 5mM KCl; 15mM MgCl2; 120mM Na2HPO4/NaH2PO4 pH7.2; 50mM Manitol |
|
| 1S | 5mM KCl; 15mM MgCl2; 120mM Na2HPO4/NaH2PO4 pH7.2; 50mM Sodium Succinate |
|
| 1SM | 5mM KCl; 15mM MgCl2; 120mM Na2HPO4/NaH2PO4 pH7.2; 25mM Sodium Succinate; 25mM Manitol |
|
| 2M | 5mM KCl, 15mM MgCl2; 15mM HEPES; 150mM Na2HPO4/NaH2PO4 pH7.2; 50mM Manitol |
|
| 2S | 5mM KCl, 15mM MgCl2; 15mM HEPES; 150mM Na2HPO4/NaH2PO4 pH7.2; 50mM Sodium Succinate |
|

Figure S1：Transfection Flow Cytometry Results in Different Buffers

| **Group** | **Results** |
| --- | --- |
| 1S | 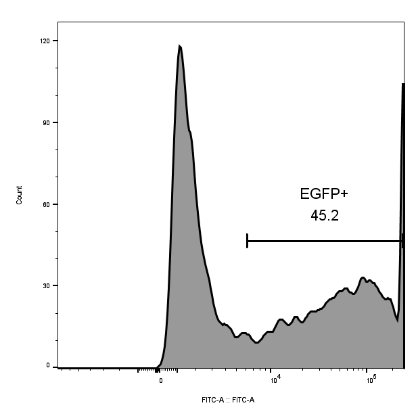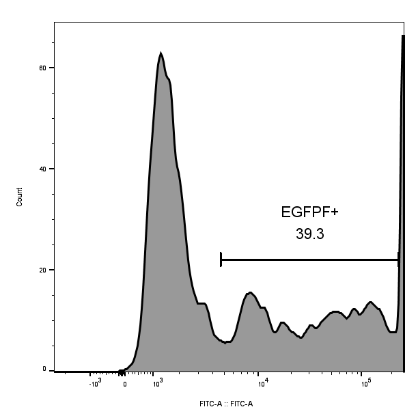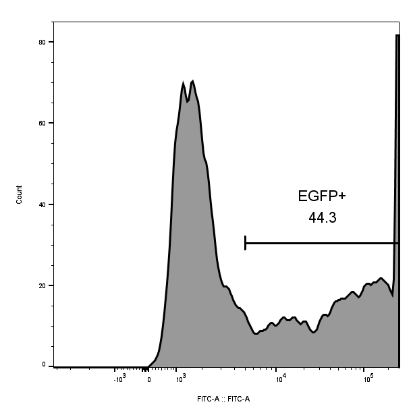 |
| 2S | 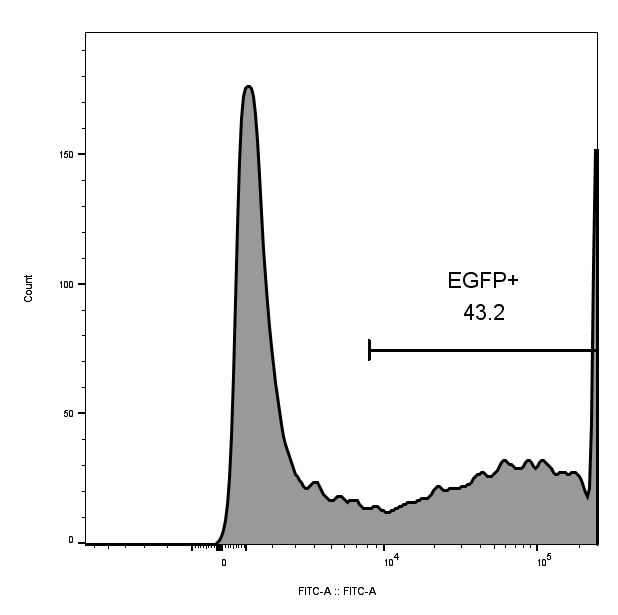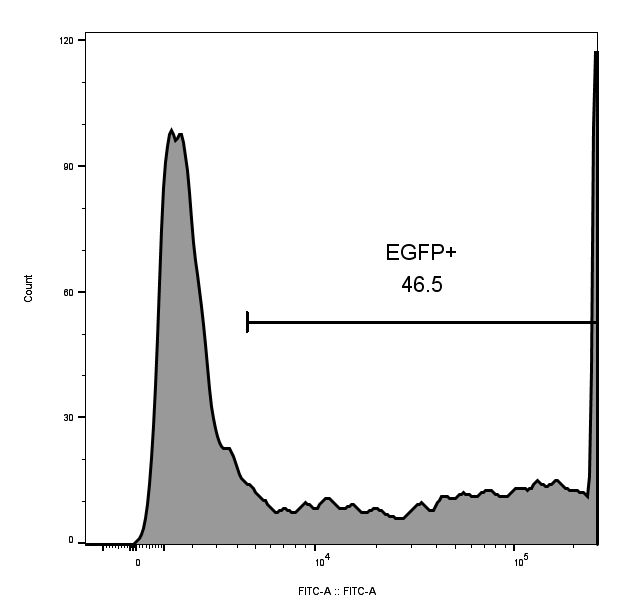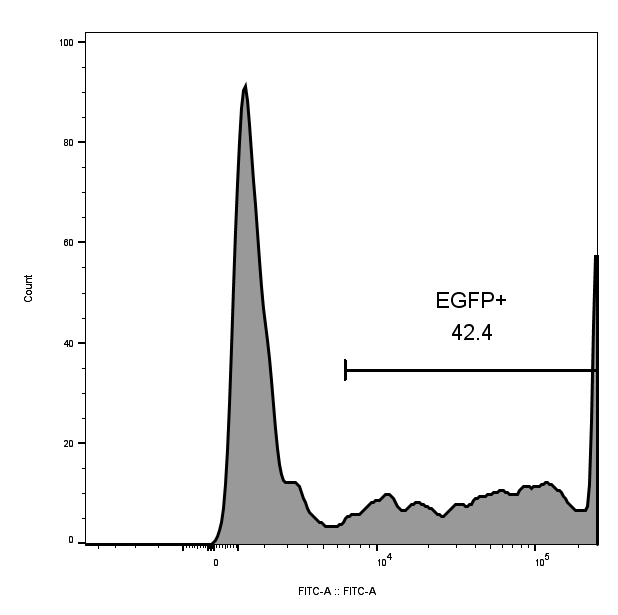 |
| 1M | 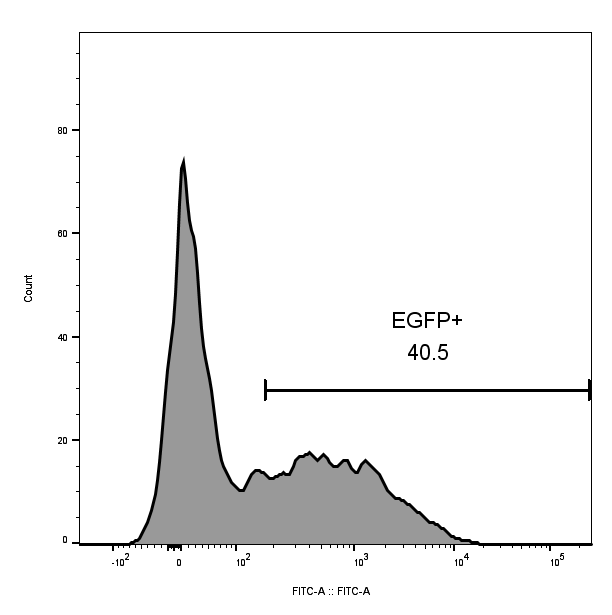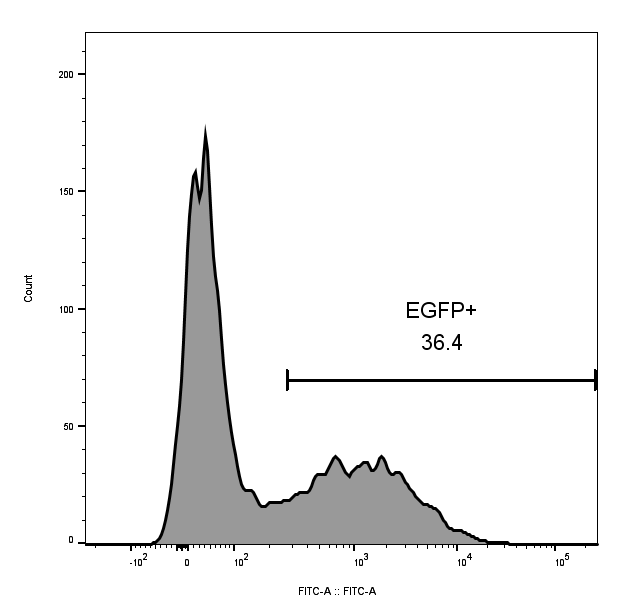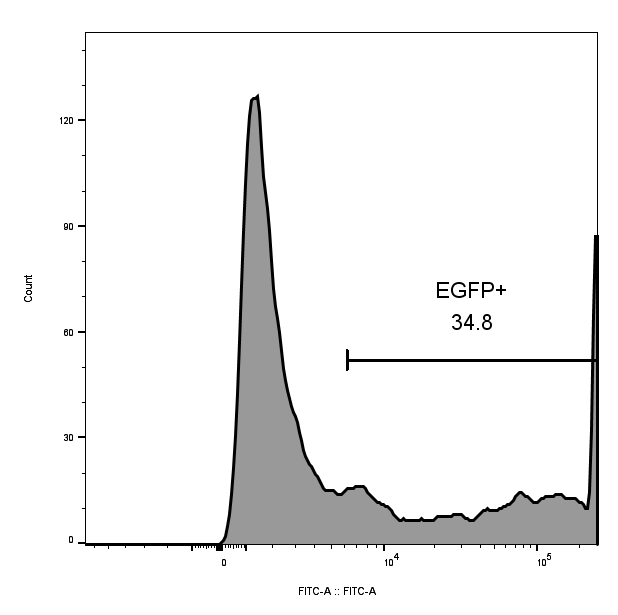 |
| 2M | 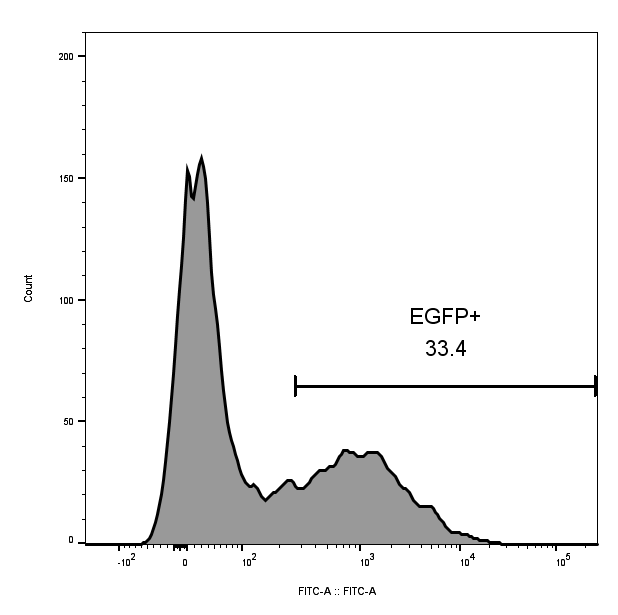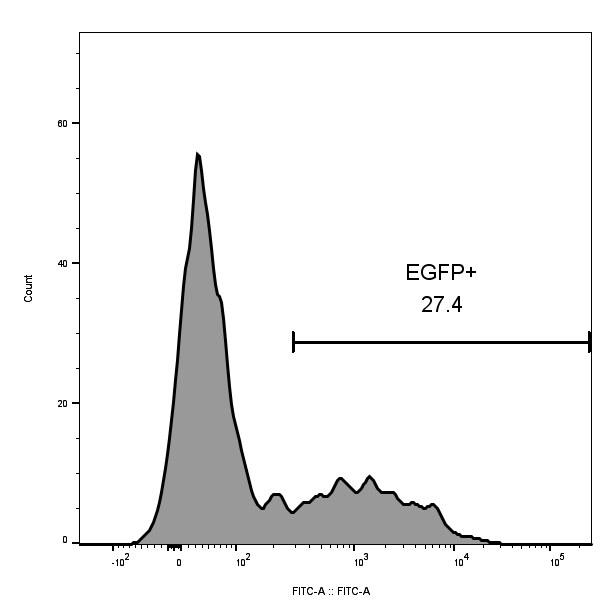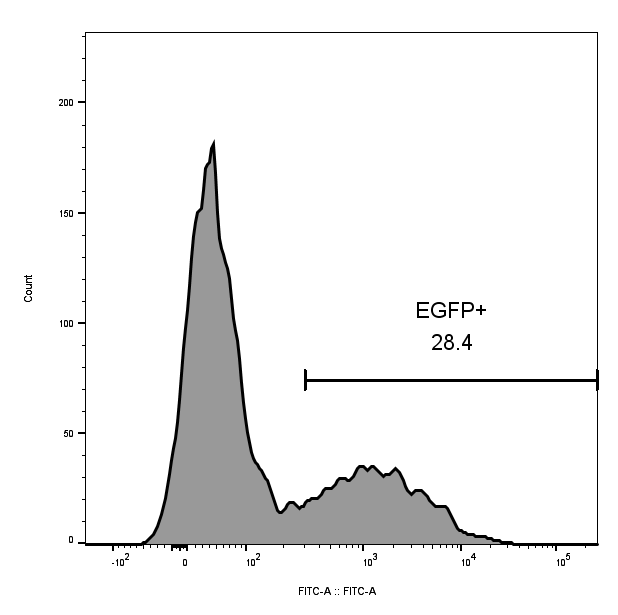 |
| 1SM | 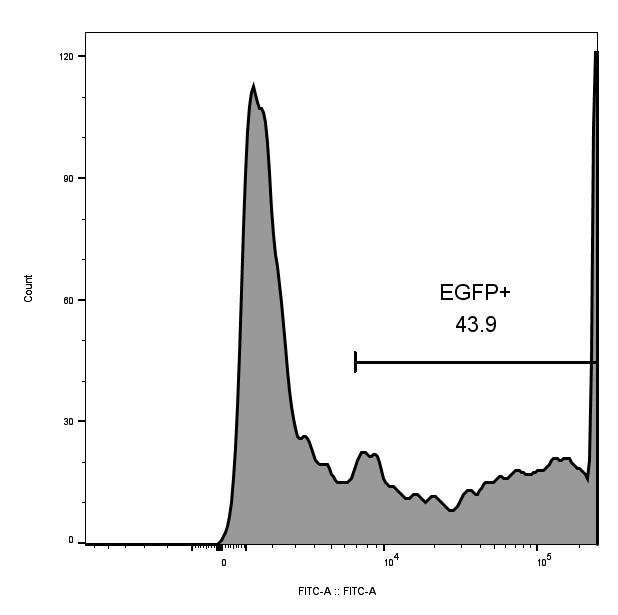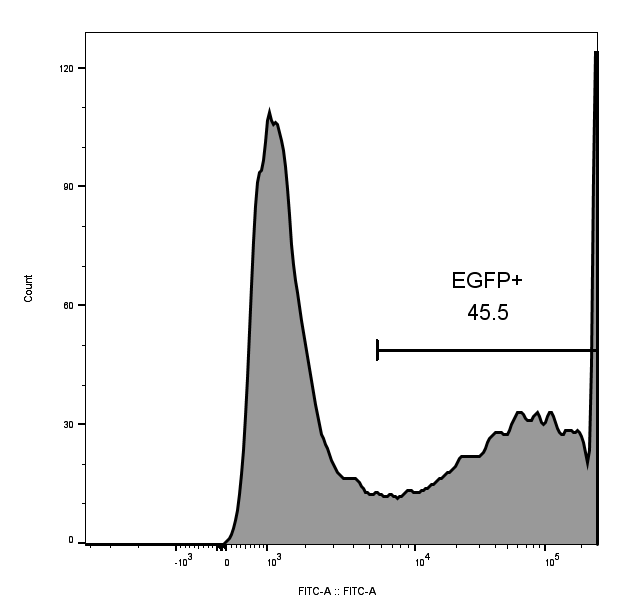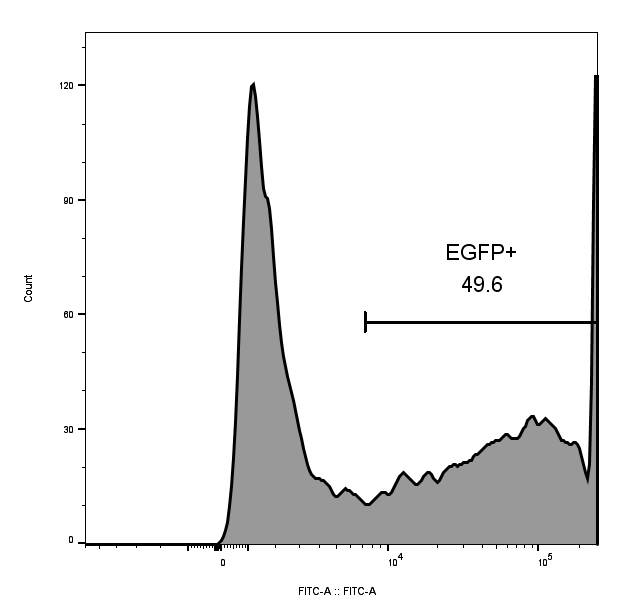 |
| BTX | 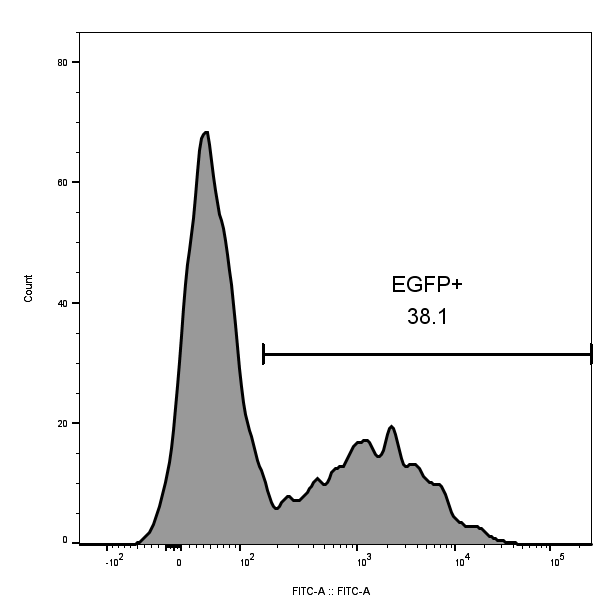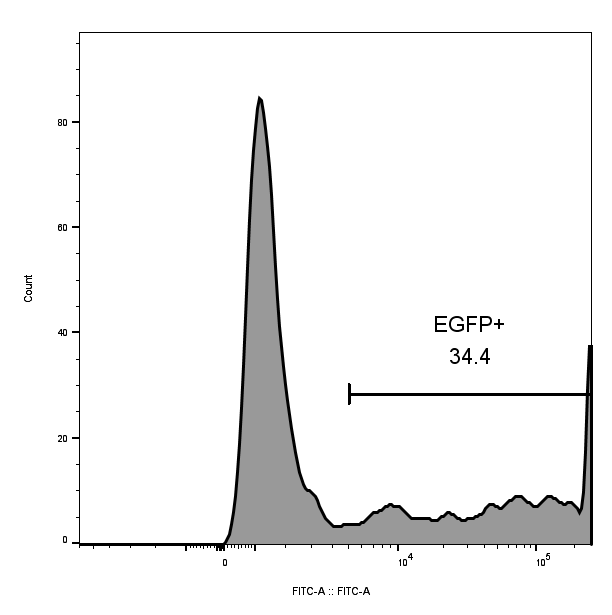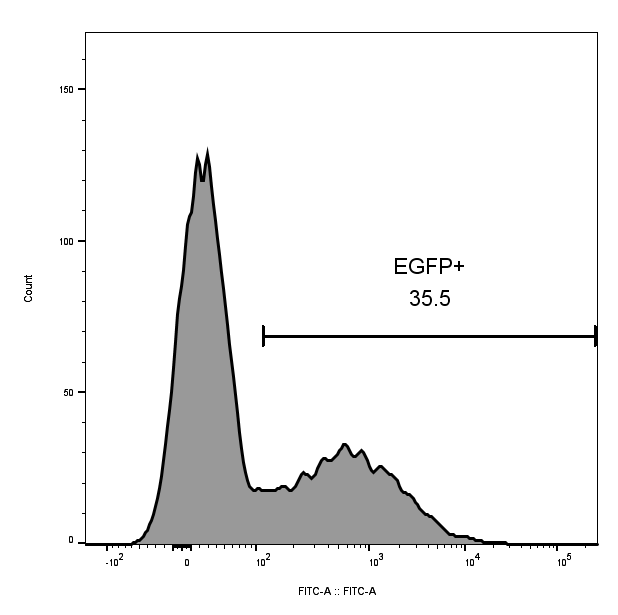 |
| DMEM | 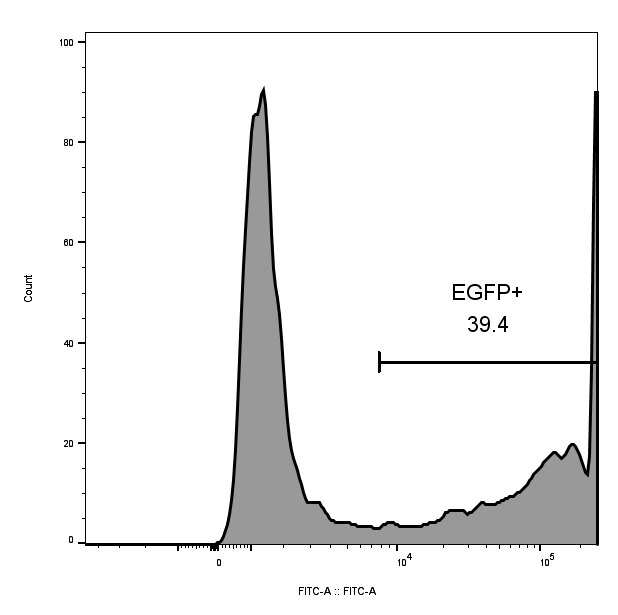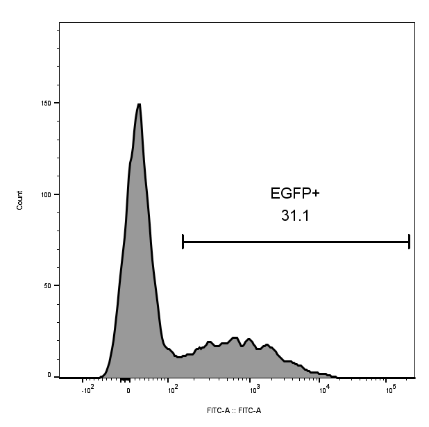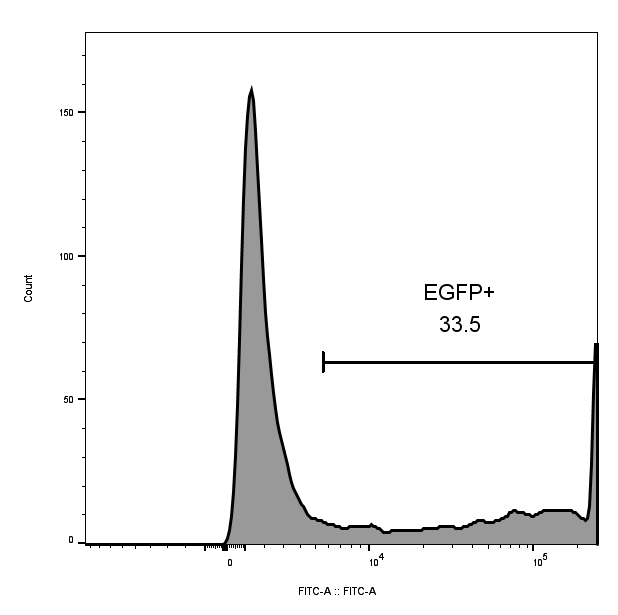 |

Figure S1：Transfection Flow Cytometry Results in Different Buffers. Electroporation was independently repeated three times (n=3) in each buffer, and the flow cytometry results for each run are shown in the figure above. The average value was taken as the final transfection efficiency for each group.

Table S2: Orthogonal Group Cell Absorbance Data

| **Group** | **1 hole(OD)** | **2 hole(OD)** | **3 hole(OD)** |
| --- | --- | --- | --- |
| 1 | 2.247 | 2.131 | 2.145 |
| 2 | 2.063 | 2.034 | 2.384 |
| 3 | 1.552 | 1.594 | 1.387 |
| 4 | 2.405 | 2.301 | 2.313 |
| 5 | 1.529 | 1.439 | 1.405 |
| 6 | 2.198 | 2.395 | 2.472 |
| 7 | 1.744 | 2.054 | 1.689 |
| 8 | 2.328 | 2.262 | 2.320 |
| 9 | 1.152 | 1.071 | 1.005 |
| blank control | 2.648 | 2.500 | 2.350 |
| medium group | 0.247 | 0.282 | 0.247 |

Figure S2: Flow cytometry results of orthogonal group transfections

| **1** | 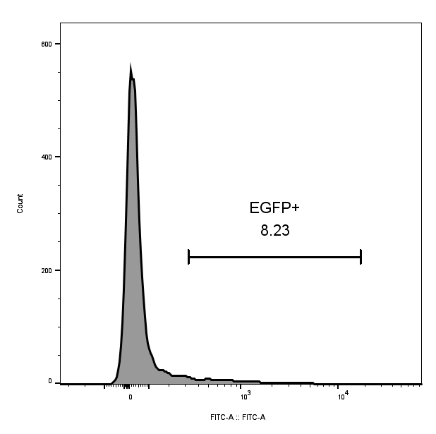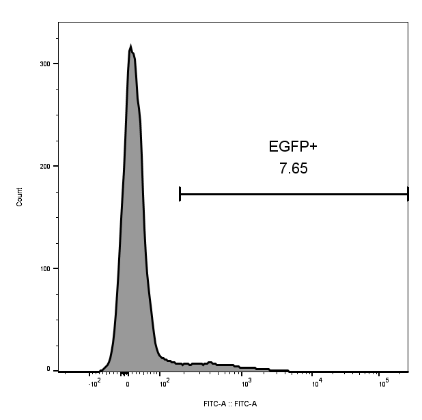**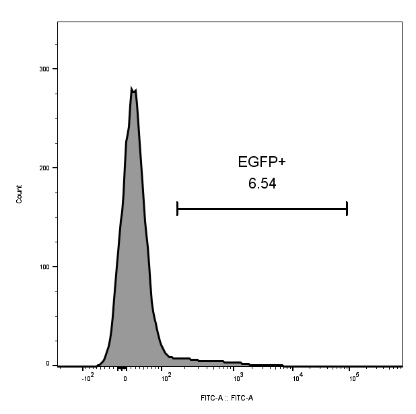** |
| --- | --- |
| **2** | **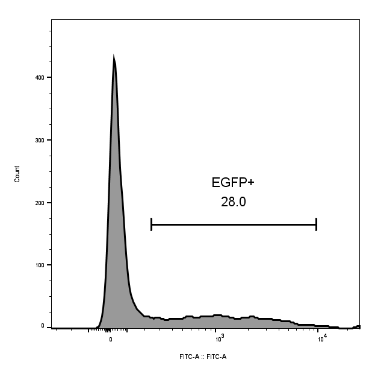**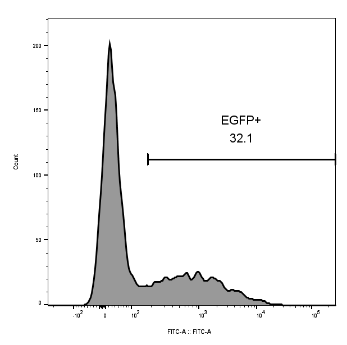**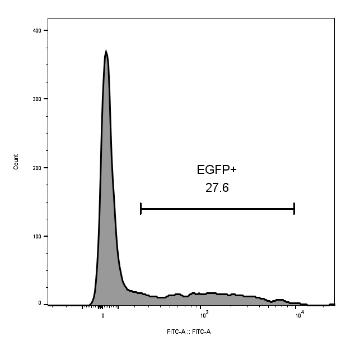** |
| **3** | 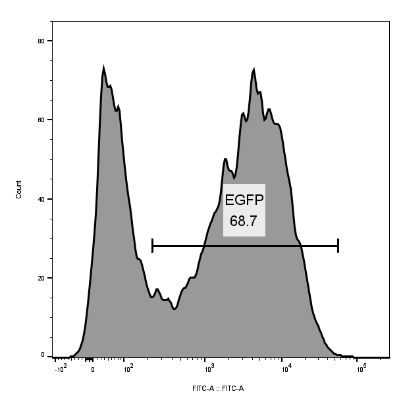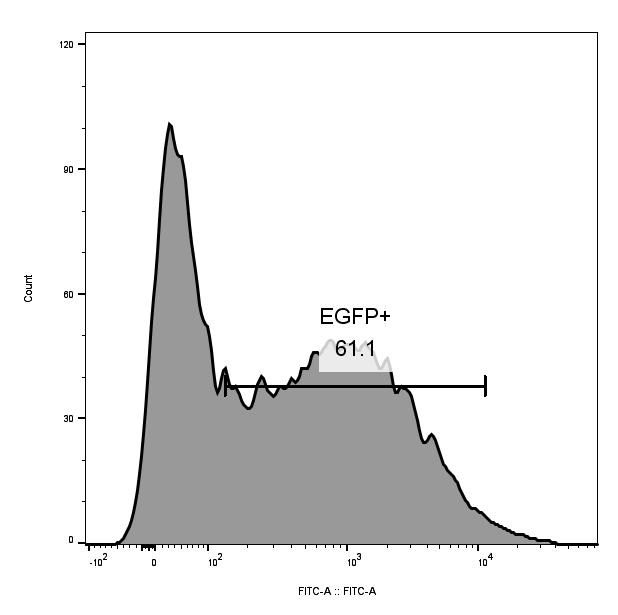**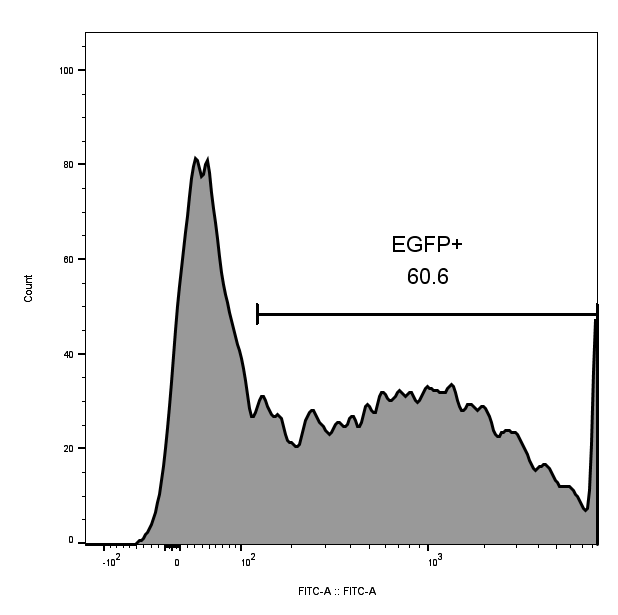** |
| **4** | 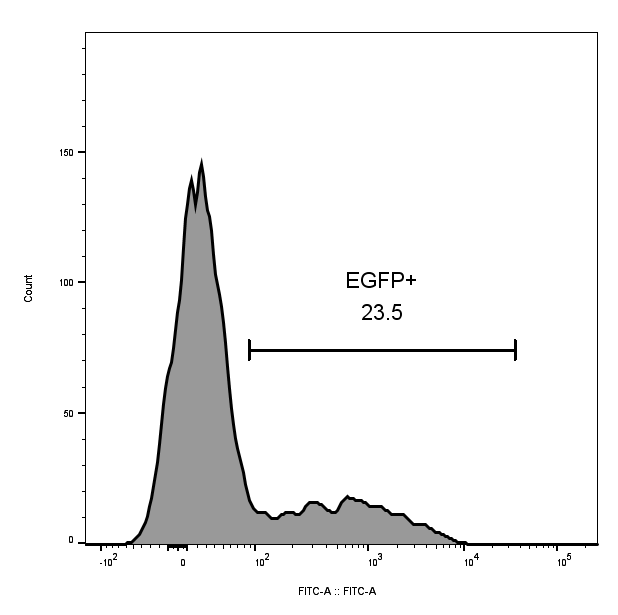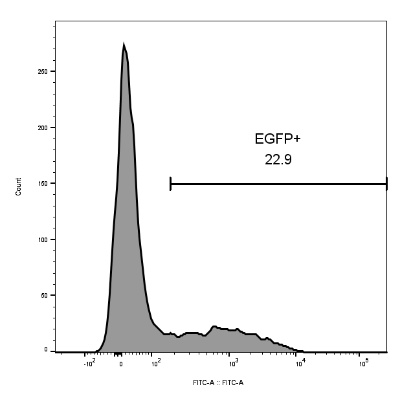**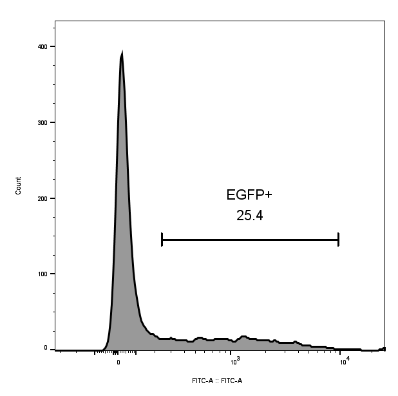** |
| **5** | **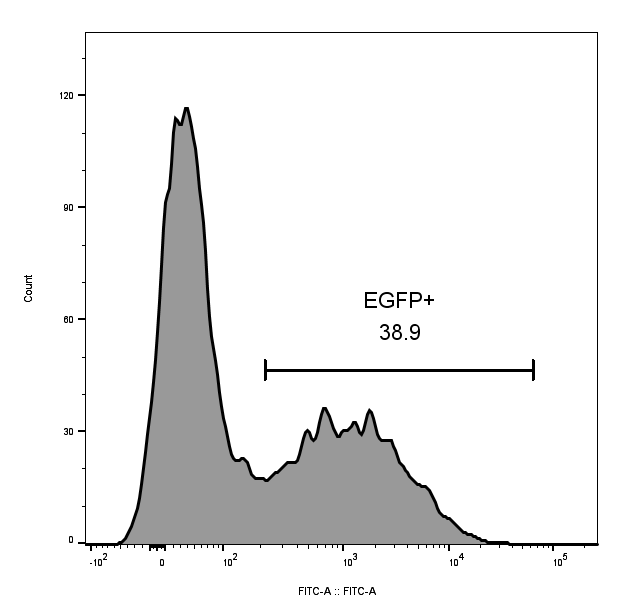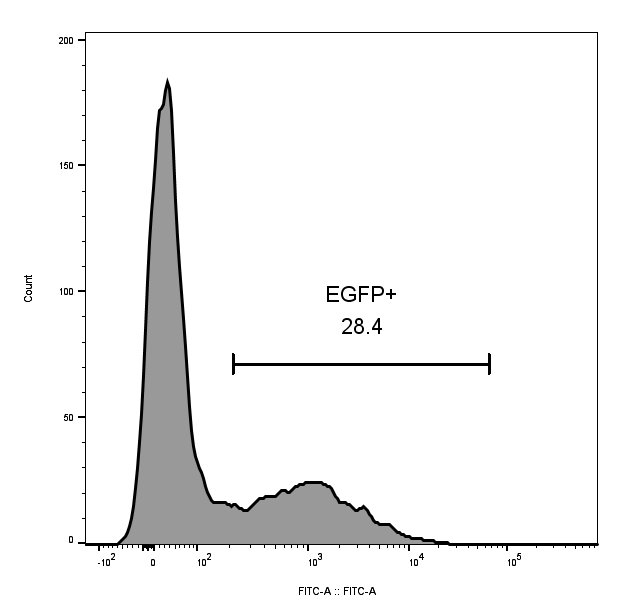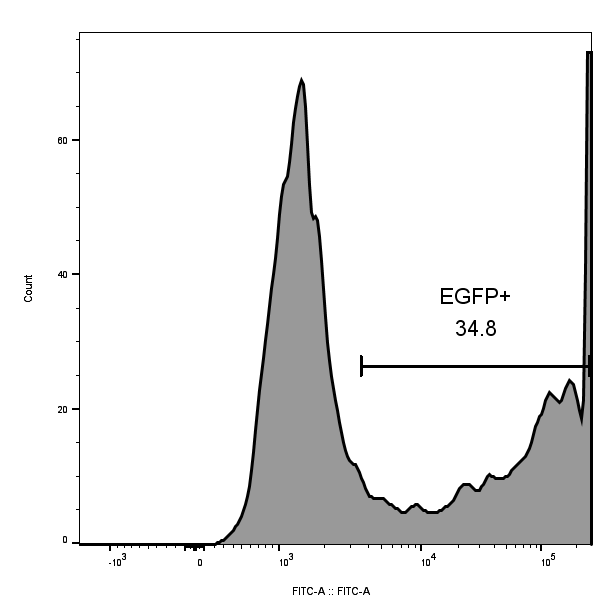** |
| **6** | 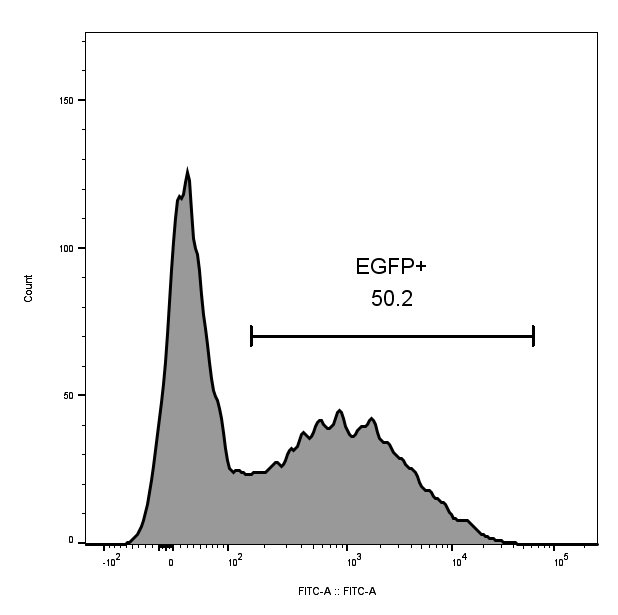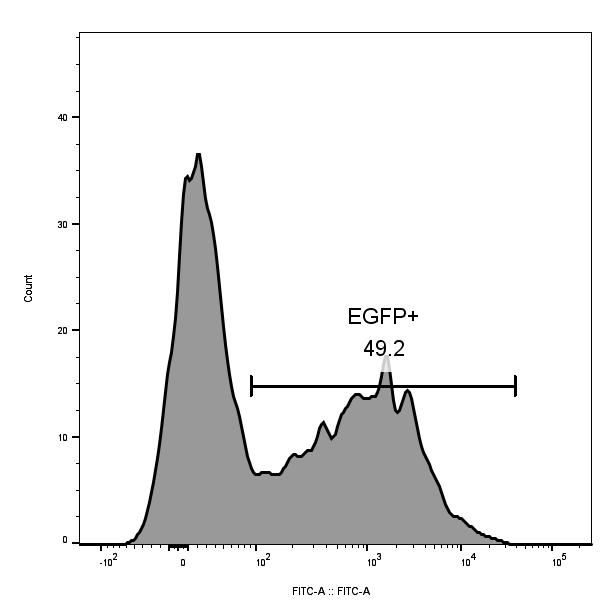**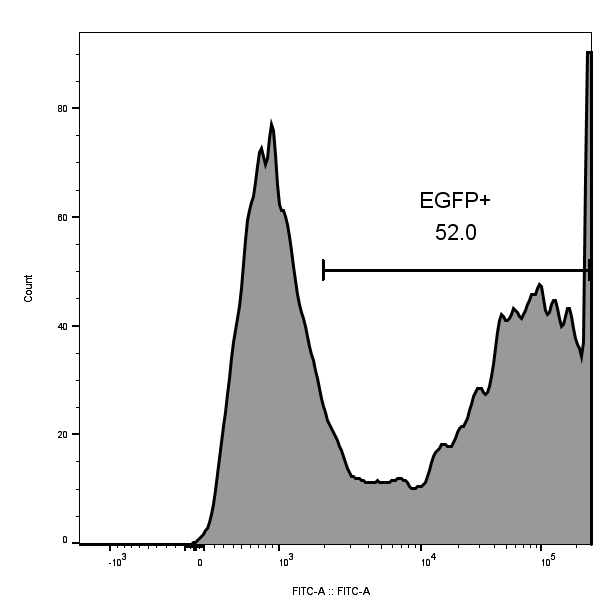** |
| **7** | **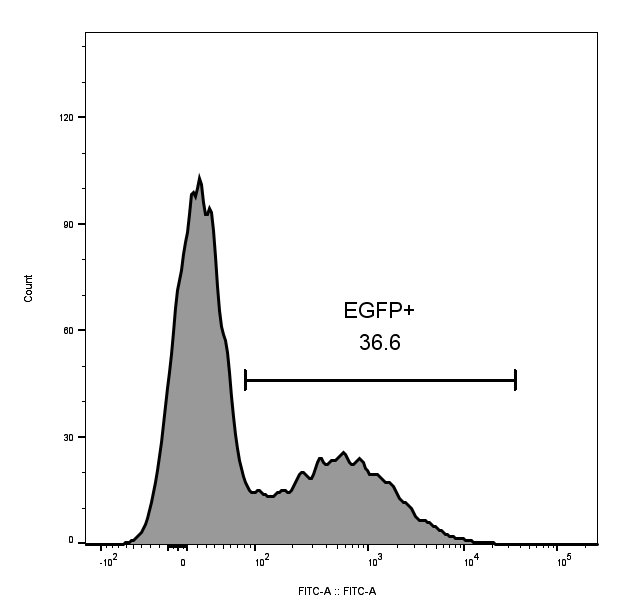**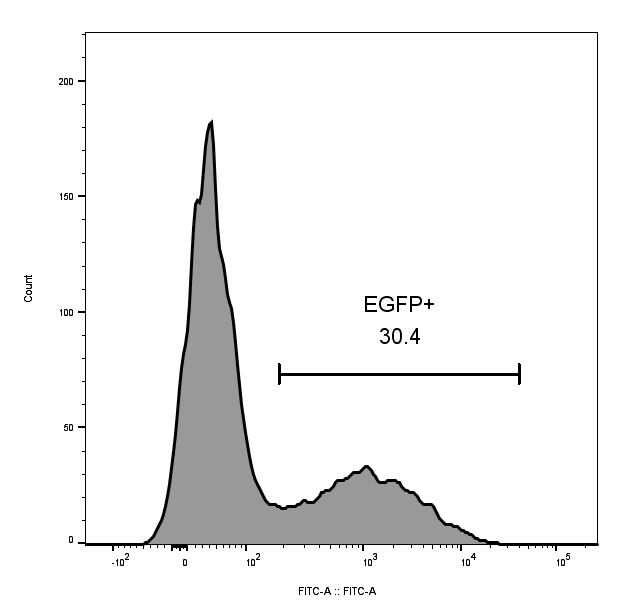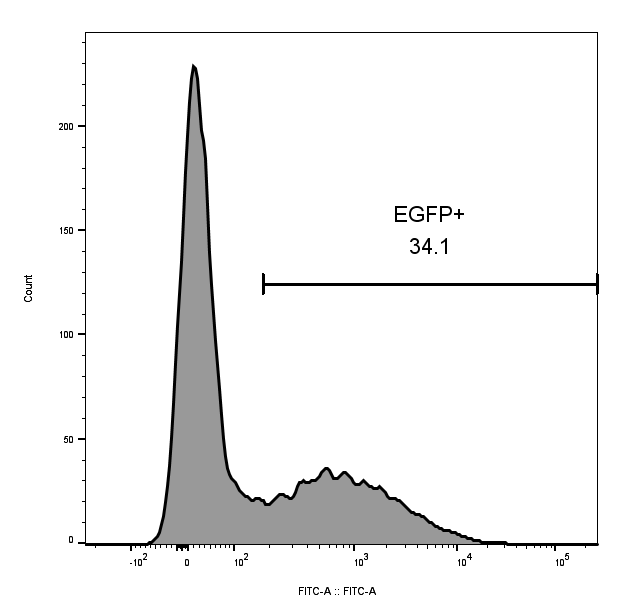 |
| **8** | 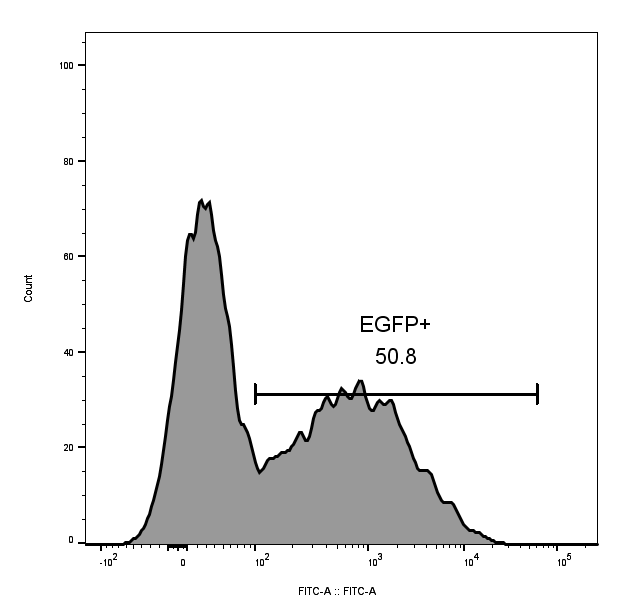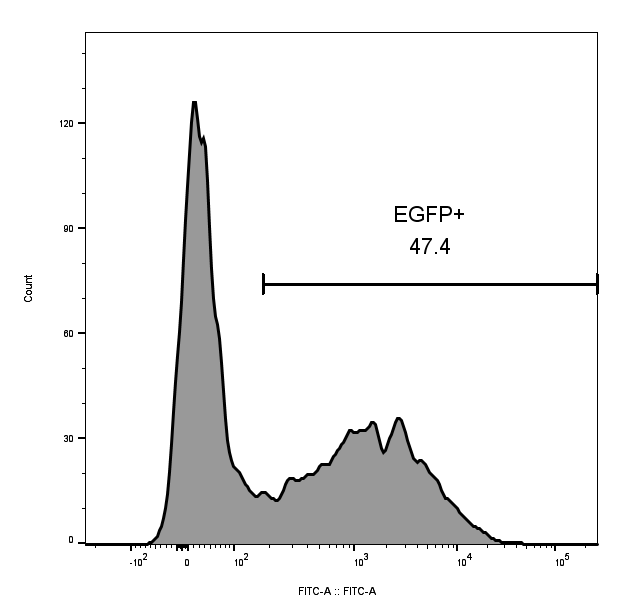**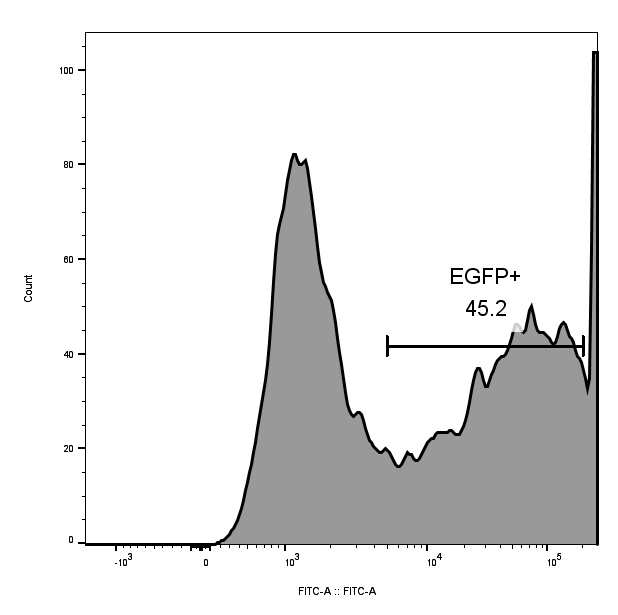** |
| **9** | 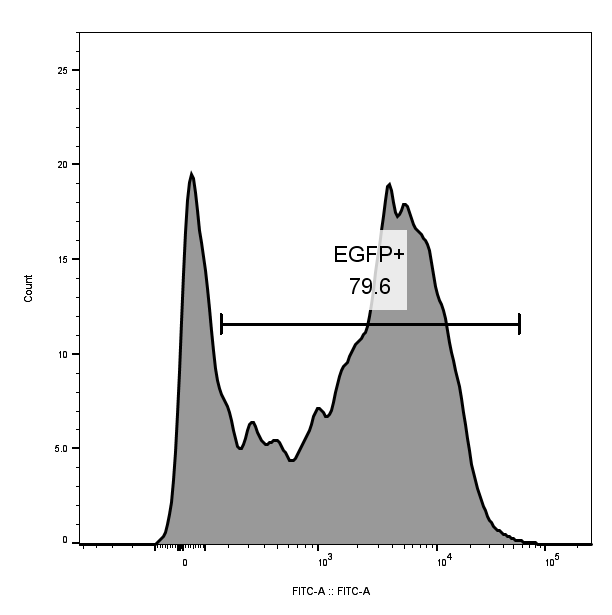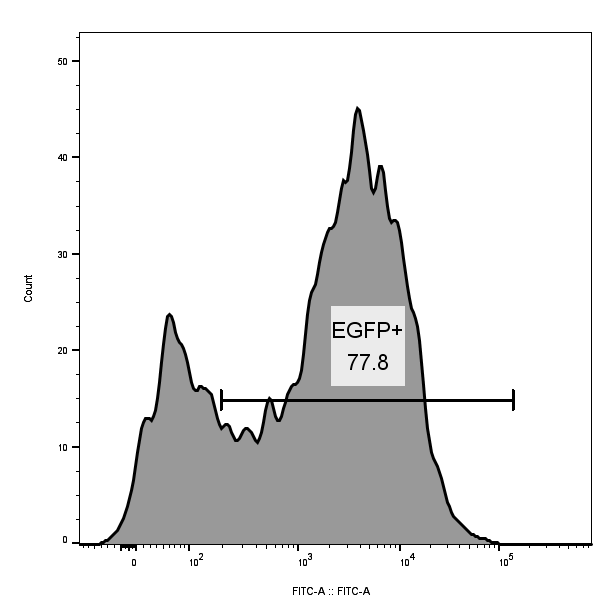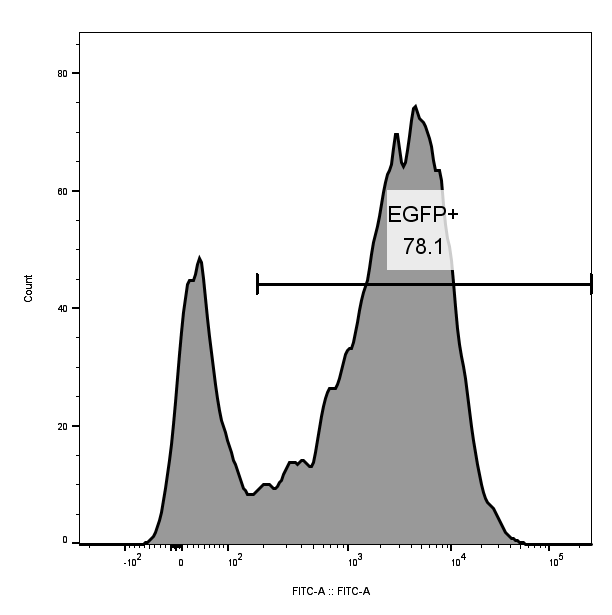 |
| **Verific-ation group** | 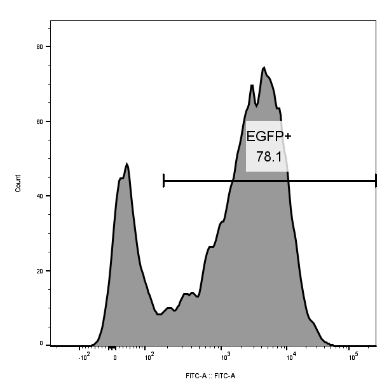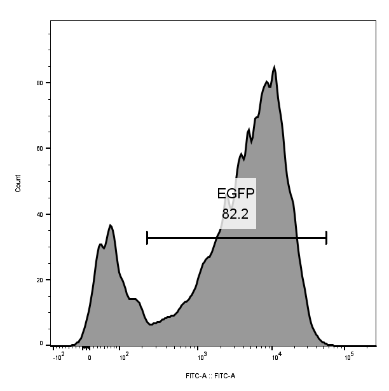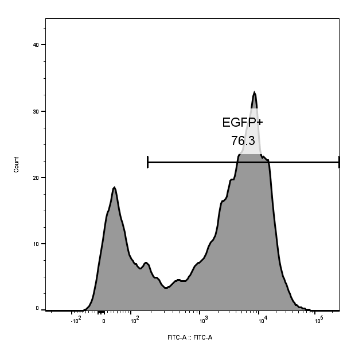 |

Figure S2：Flow cytometry results of orthogonal group transfections. According to the orthogonal design, each group underwent 3 independent repetitions of electroporation (n=3), and the flow cytometry results for each repetition are shown in the figure above. The final transfection efficiency of each group was calculated based on its average value.
